# Supplementary material
Source: Springer Nature journal article supplement (https://www.springermedizin.de/resource/supplementary/13047_2008_6_MOESM2_ESM.pdf/9662974)

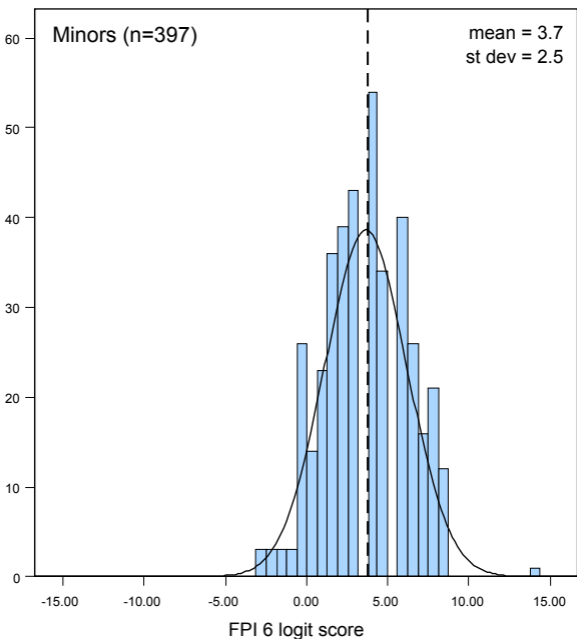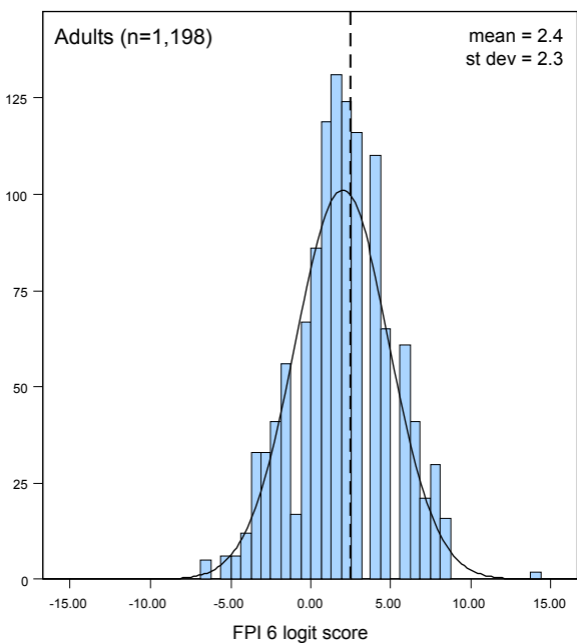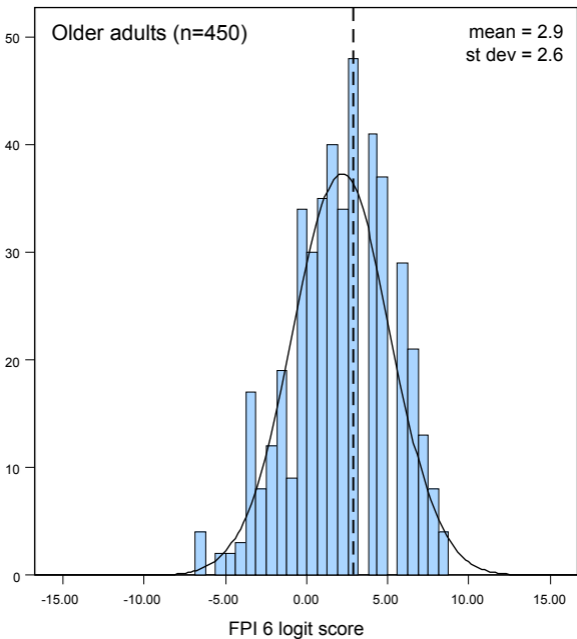

Supplement: MOESM2 [file 9662974]
